# Supplementary material for: Plasma high‐density lipoprotein cargo is altered in Alzheimer's disease and is associated with regional brain volume
Source: PubMed Central journal article supplement — J Neurochem. 2022 Aug 24;163(1):53–67. doi: 10.1111/jnc.15681 (PMC9804612; doi:10.1111/jnc.15681), 2022-08-24
Supplement: JNC-163-53-s001.pdf [file JNC-163-53-s001.pdf]

## Supplementary Material

### **Plasma high density lipoprotein cargo is altered in Alzheimer's disease and is associated with regional brain volume**

Steve Pedrini<sup>a,b</sup>, James D. Doecke<sup>c</sup>, Eugene Hone<sup>a,b</sup>, Penghao Wang<sup>d</sup>, Rohith Thota<sup>e</sup>, Ashley I. Bush<sup>b,f</sup>, Christopher C. Rowe<sup>g</sup>, Vincent Dore<sup>g</sup>, Victor L. Villemagne<sup>h</sup>, David Ames<sup>i,j</sup>, Stephanie Rainey-Smith<sup>a,k</sup>, Giuseppe Verdile<sup>l,m</sup>, Hamid R. Sohrabi<sup>k</sup>, Manfred R. Raida<sup>n</sup>, Kevin Taddei<sup>a,b</sup>, Sam Gandy<sup>o</sup>, Colin L. Masters<sup>f</sup>, Prathishtha Chatterjee<sup>e</sup>, and Ralph N. Martins<sup>a,b,e,p\*</sup> and the AIBL Research Group<sup>7</sup>.

### Supplementary Table 1

Comparison of HDL-associated cargo (ApoA-I, ApoA-II, ApoC-I, ApoC-III, ApoD, ApoE, ApoH, ApoJ, CRP and SAA) per ml of plasma in stable HC, HC-Converters and AD.

|                         | <b>HC</b>   | <b>HC-Conv</b> | <b>AD</b>   | <b>p</b>      |
|-------------------------|-------------|----------------|-------------|---------------|
| µgHDL-assApoA-I/ml PL   | 493 ± 144   | 460 ± 114      | 431 ± 94    | <b>0.0091</b> |
| µgHDL-assApoA-II/ml PL  | 138 ± 54    | 123 ± 49       | 106 ± 32    | <b>0.0014</b> |
| µgHDL-assApoC-I/ml PL   | 138 ± 46    | 130 ± 40       | 116 ± 37    | <b>0.0356</b> |
| µgHDL-assApoC-III/ml PL | 28.8 ± 13.0 | 26.5 ± 12.0    | 24.4 ± 9.7  | 0.2180        |
| µgHDL-assApoD/ml PL     | 21.1 ± 4.5  | 20.0 ± 5.2     | 21.1 ± 5.0  | 0.9650        |
| µgHDL-assApoE/ml PL     | 6.75 ± 3.34 | 5.78 ± 2.39    | 4.49 ± 2.23 | <b>0.0072</b> |
| µgHDL-assApoH/ml PL     | 248 ± 69    | 231 ± 57       | 208 ± 67    | <b>0.0046</b> |
| µgHDL-assApoJ/ml PL     | 22.3 ± 6.1  | 19.7 ± 4.3     | 19.1 ± 4.6  | <b>0.0008</b> |
| µgHDL-assCRP/ml PL      | 2.47 ± 1.03 | 2.12 ± .51     | 1.95 ± .99  | <b>0.0009</b> |
| µgHDL-assSAA/ml PL      | 5.92 ± 5.91 | 4.15 ± 4.27    | 8.22 ± 8.88 | 0.7730        |

Supplementary Table 1. Values are presented as mean ± S.D. Generalized Linear Model analyses were performed unadjusted. Data are presented as raw values, but statistical analysis was performed on log-transformed data to better approximate normal distribution. Analysis was considered significant with  $p < 0.05$  (bold).

### Supplementary Table 2

Partial correlation of HDL-cholesterol and HDL-cargo (ApoA-II, ApoC-I, ApoC-III, ApoD, ApoE, ApoH, ApoJ, CRP and SAA) expressed as ratio to ApoA-I with MMSE (at t0) in individuals with AD.

|                        | MMSE t0        |                |
|------------------------|----------------|----------------|
|                        | r <sup>a</sup> | p <sup>a</sup> |
| μgCholesterol/μgApoA-I | .023           | .838           |
| ngApoA-II/μgApoA-I     | -.102          | .376           |
| ngApoC-I/μgApoA-I      | -.104          | .364           |
| ngApoC-III/μgApoA-I    | .078           | .498           |
| ngApoD/μgApoA-I        | -.022          | .852           |
| ngApoE/μgApoA-I        | .001           | .995           |
| ngApoH/μgApoA-I        | .134           | .244           |
| ngApoJ/μgApoA-I        | .018           | .876           |
| ngCRP/μgApoA-I         | -.010          | .933           |
| ngSAA/μgApoA-I         | -.050          | .665           |

Supplementary Table 2. Pearson's correlation adjusted for age, gender, and ApoE ε4-carrier status was performed between HDL-cargo and MMSE. Analysis was considered significant with  $p < 0.05$ . <sup>a</sup> Data were adjusted for age, gender, and ApoE ε4-carrier status.

Supplementary Figure 1

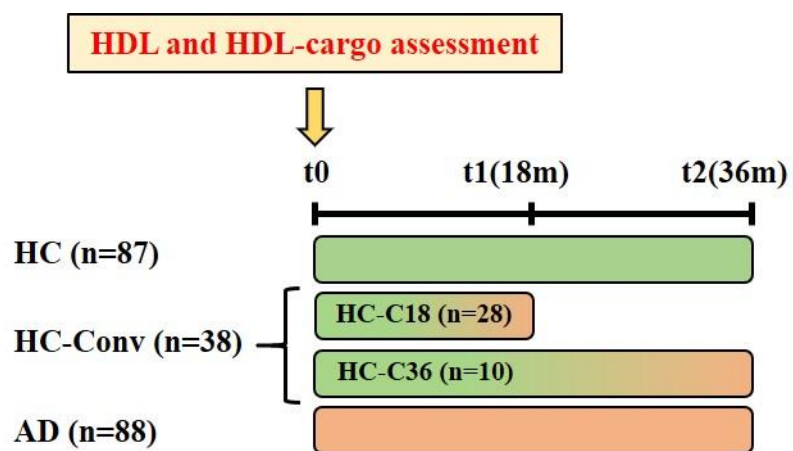

Supplementary Figure 1. Graphical representation of individual distribution across clinical classification groups.
